# Supplementary material
Source: publisher site journal article supplement (https://www.dovepress.com/article/435537)
Supplement: Supplementary file 1 [file get_supplementary_file.php]

## Supplementary materials

Table S1 Risks for CKD onset according to standard deviation grouping of mean SUA levels

| Serum Uric Acid | Development of CKD |            |         |        |            |         |        |            |         |
|-----------------|--------------------|------------|---------|--------|------------|---------|--------|------------|---------|
|                 | Model1             |            |         | Model2 |            |         | Model3 |            |         |
|                 | OR                 | 95%CI      | P-value | OR     | 95%CI      | P-value | OR     | 95%CI      | P-value |
| <b>Man</b>      |                    |            |         |        |            |         |        |            |         |
| S1              |                    | reference  |         |        | reference  |         |        | reference  |         |
| S2              | 1.36               | 0.68-2.73  | 0.388   | 1.34   | 0.67-2.67  | 0.414   | 1.36   | 0.67-2.74  | 0.396   |
| S3              | 2.95               | 1.54-5.68  | 0.001   | 2.75   | 1.43-5.30  | 0.002   | 2.89   | 1.48-5.61  | 0.002   |
| S4              | 7.75               | 4.04-14.84 | <0.001  | 7.15   | 3.69-13.84 | <0.001  | 7.86   | 4.02-15.36 | <0.001  |
| <b>Woman</b>    |                    |            |         |        |            |         |        |            |         |
| S1              |                    | reference  |         |        | reference  |         |        | reference  |         |
| S2              | 1.41               | 0.62-3.20  | 0.418   | 1.36   | 0.60-3.11  | 0.462   | 1.38   | 0.60-3.16  | 0.448   |
| S3              | 2.18               | 0.98-4.85  | 0.057   | 1.95   | 0.87-4.36  | 0.106   | 1.99   | 0.89-4.48  | 0.096   |
| S4              | 11.01              | 5.06-23.92 | <0.001  | 8.83   | 3.96-19.68 | <0.001  | 8.78   | 3.91-19.71 | <0.001  |

Note: Model 1 was unadjusted. Model 2 on FBG was adjusted for age and BMI. Model 3 was adjusted for age, BMI, SBP, DBP, FBG, Creatine, and TC. Abbreviations: SUA, serum uric acid; CKD, chronic kidney disease. S1, less than one standard deviation below the mean; S2, one standard deviation below the mean; S3, mean to one standard deviation above the mean; S4, more than one standard deviation above the mean.

Table S2 Risks for CKD in Men by Age and Uric Acid Quartile Levels

| Serum Uric Acid | Development of CKD |            |         |           |           |         |
|-----------------|--------------------|------------|---------|-----------|-----------|---------|
|                 | <65 years          |            |         | ≥65 years |           |         |
|                 | OR                 | 95%CI      | P-value | OR        | 95%CI     | P-value |
| Q1              |                    | reference  |         |           | reference |         |
| Q2              | 0.76               | 0.16-3.70  | 0.736   | 0.86      | 0.46-1.61 | 0.644   |
| Q3              | 1.92               | 0.45-8.17  | 0.377   | 1.42      | 0.80-2.52 | 0.230   |
| Q4              | 4.20               | 1.10-16.07 | 0.036   | 2.01      | 1.16-3.47 | 0.012   |

Note: The model was adjusted for age, BMI, systolic blood pressure, diastolic blood pressure, fasting blood glucose, creatinine, and total cholesterol. Abbreviations: CKD, chronic kidney disease.

Table S3 Risks for CKD in Women by menopausal status and Uric Acid Quartile Levels

| Serum Uric Acid | Development of CKD |            |         |                |           |         |
|-----------------|--------------------|------------|---------|----------------|-----------|---------|
|                 | Premenopausal      |            |         | Postmenopausal |           |         |
|                 | OR                 | 95%CI      | P-value | OR             | 95%CI     | P-value |
| Q1              |                    | reference  |         |                | reference |         |
| Q2              | 3.05               | 0.34-27.41 | 0.320   | 0.59           | 0.29-1.22 | 0.153   |
| Q3              | 2.46               | 0.19-31.32 | 0.488   | 1.38           | 0.74-2.57 | 0.312   |
| Q4              | 3.61               | 0.54-23.96 | 0.184   | 2.83           | 1.59-5.02 | <0.001  |

Note: The model was adjusted for age, BMI, systolic blood pressure, diastolic blood pressure, fasting blood glucose,

14 creatinine, and total cholesterol. Abbreviations: CKD, chronic kidney disease.

15

16

Table S4 Risks for CKD by BMI and Uric Acid Quartile Levels

| Serum Uric Acid | Development of CKD |           |         |       |            |         |
|-----------------|--------------------|-----------|---------|-------|------------|---------|
|                 | Non-obese          |           |         | Obese |            |         |
|                 | OR                 | 95%CI     | P-value | OR    | 95%CI      | P-value |
| Man             |                    |           |         |       |            |         |
| Q1              |                    | reference |         |       | reference  |         |
| Q2              | 0.97               | 0.52-1.81 | 0.918   | 0.32  | 0.04-2.67  | 0.290   |
| Q3              | 1.43               | 0.77-2.65 | 0.256   | 1.95  | 0.55-6.86  | 0.301   |
| Q4              | 2.46               | 1.40-4.35 | 0.002   | 1.94  | 0.55-6.90  | 0.304   |
| Woman           |                    |           |         |       |            |         |
| Q1              |                    | reference |         |       | reference  |         |
| Q2              | 0.59               | 0.30-1.20 | 0.148   | 0.98  | 0.06-15.39 | 0.988   |
| Q3              | 1.27               | 0.68-2.37 | 0.457   | 2.03  | 0.22-18.71 | 0.532   |
| Q4              | 2.62               | 1.48-4.63 | 0.001   | 3.96  | 0.47-33.35 | 0.206   |

17 Note: The model was adjusted for age, BMI, systolic blood pressure, diastolic blood pressure, fasting blood glucose,

18 creatinine, and total cholesterol. Abbreviations: CKD, chronic kidney disease.

19
